# Supplementary material
Source: Springer Nature journal article supplement (https://www.springermedizin.de/resource/supplementary/12978_2011_111_MOESM1_ESM.pdf/9602886)
Supplement: MOESM1 [file 9602886]

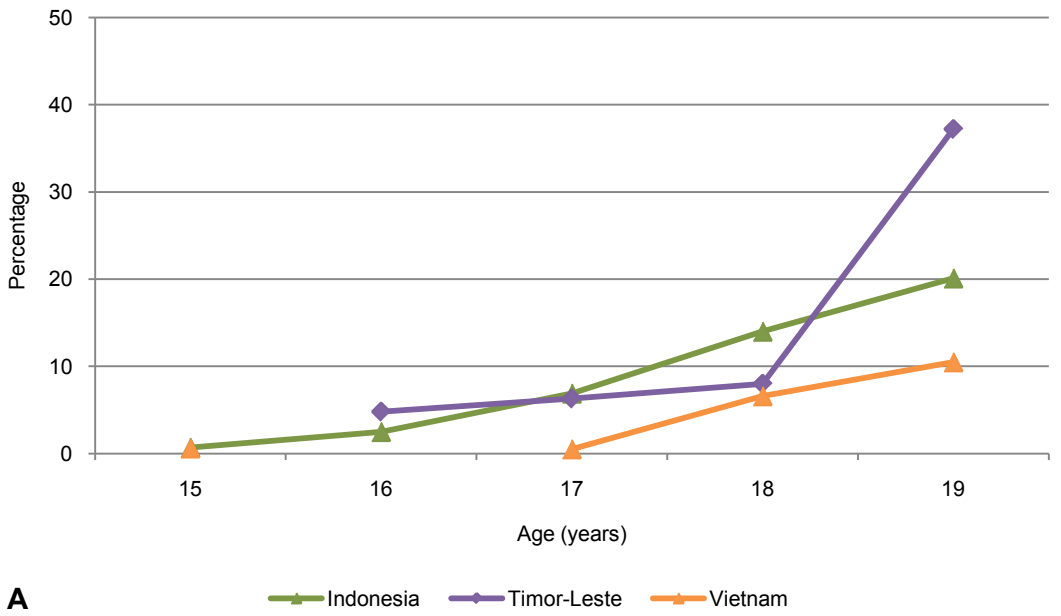

Indonesia Timor-Leste Vietnam

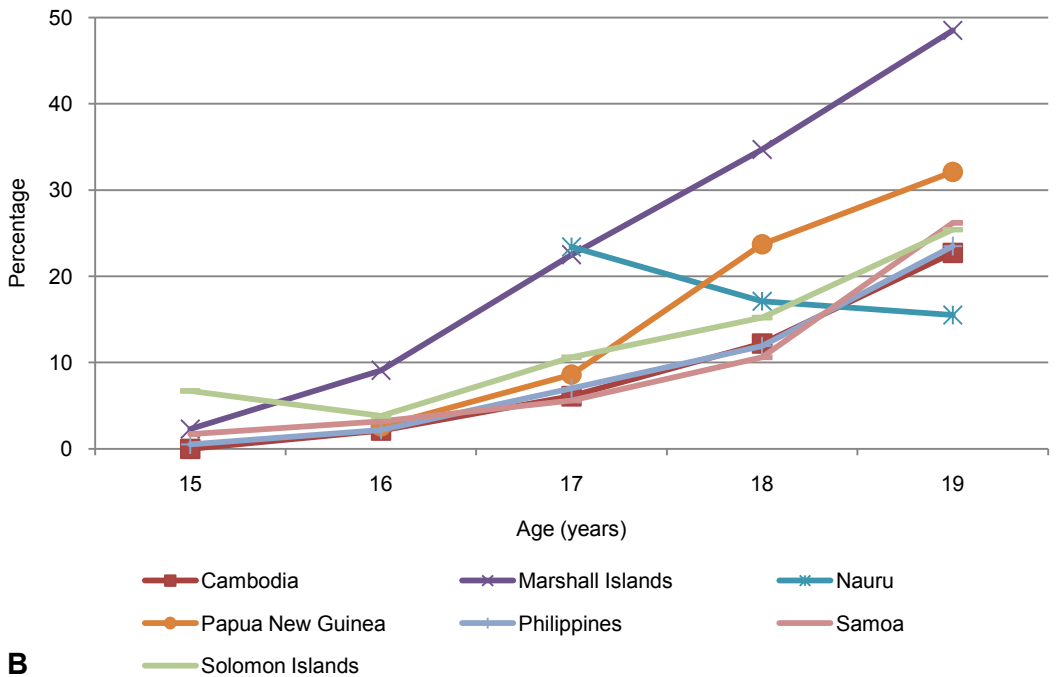

Cambodia Marshall Islands Nauru  
 Papua New Guinea Philippines Samoa  
 Solomon Islands
